# Supplementary material for: Infrared neural stimulation with 7T fMRI: A rapid in vivo method for mapping cortical connections of primate amygdala
Source: PubMed Central journal article supplement — Neuroimage. Author manuscript; Available in PMC 2023 Feb 23. (PMC9947864; doi:10.1016/j.neuroimage.2021.117818), 2021-02-04
Supplement: NIHMS1864642-supplement-Supplementary_Material.pdf [file NIHMS1864642-supplement-Supplementary_Material.pdf]

# Supplementary Information

## **Infrared neural stimulation with 7T fMRI: a rapid in vivo method for mapping cortical connections of primate amygdala**

Augix Guohua Xu<sup>1\*</sup>, Sunhang Shi<sup>1,2,\*</sup>, Yun-Yun Rui<sup>1</sup>, Xiaotong Zhang<sup>1,2</sup>, Lizabeth Romanski<sup>3</sup>, Katalin M. Gothard<sup>4</sup>, and Anna Wang Roe<sup>1,2,\*\*</sup>.

<sup>1</sup>Dept of Neurology of the Second Affiliated Hospital, Interdisciplinary Institute of Neuroscience and Technology, School of Medicine, Zhejiang University, Hangzhou, China.

<sup>2</sup>Key Laboratory of Biomedical Engineering of Ministry of Education, College of Biomedical Engineering & Instrument Science, Zhejiang University, Hangzhou, China.

<sup>3</sup>Dept of Neuroscience, University of Rochester School of Medicine, Rochester, NY, USA.

<sup>4</sup>Dept of Physiology, University of Arizona, Tucson AZ, USA.

\*Equal contributors

\*\*corresponding author: [annawang@zju.edu.cn](mailto:annawang@zju.edu.cn)

### Supplementary Figure 1: No EPI ghosting

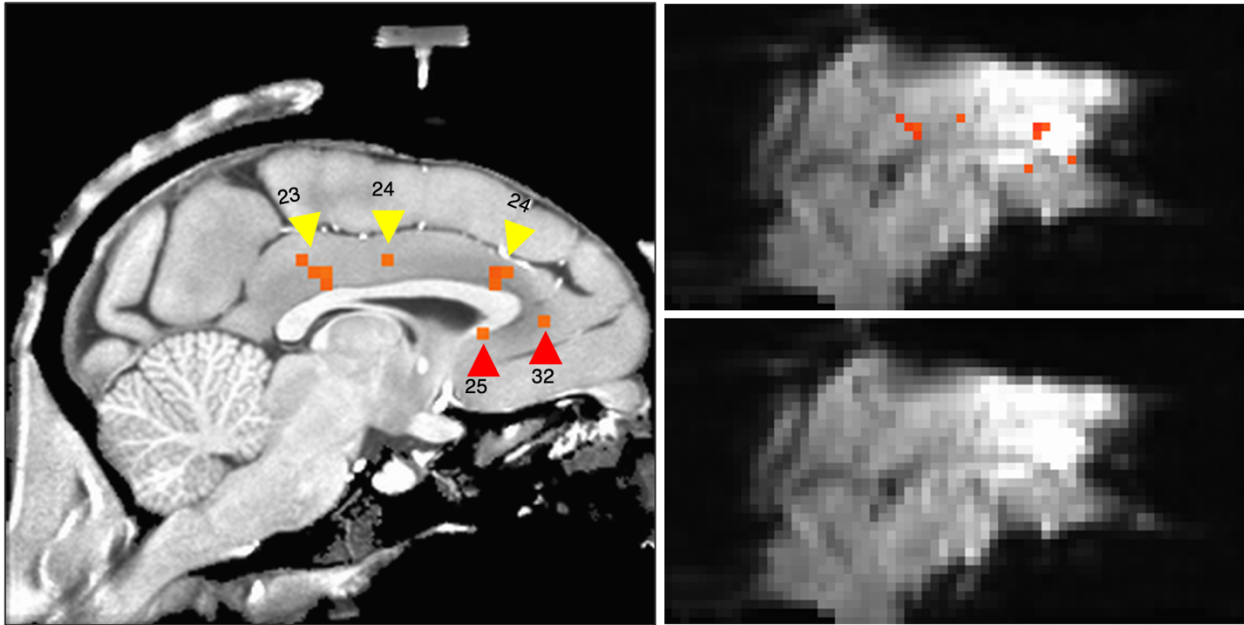

This figure addresses the concern that ghosting (e.g. N/2 N/4 ghosting...) may induce artificial repetitive patterns and thereby contribute to the patchy activations in cingulate. Here, we show that the functional EPI images do not display ghosting artifacts. In the figure above, significant voxels overlaid on structural image in panel A, and on functional EPI image in panel B. The same EPI slice is shown again on panel C without overlay of activation. One can see from panel C that the original EPI image does not display ghosting effect in cingulate cortex. Furthermore, N/2 N/4 ghosting exhibits artifacts with much lower spatial frequencies that are unlike the patchy profile patterns. Also, the signal intensities of ghosting voxels are usually much lower than normal ones, which make them hard to detect as significant BOLD activations.

## Supplementary Figure 2: Control stimulation site, putamen

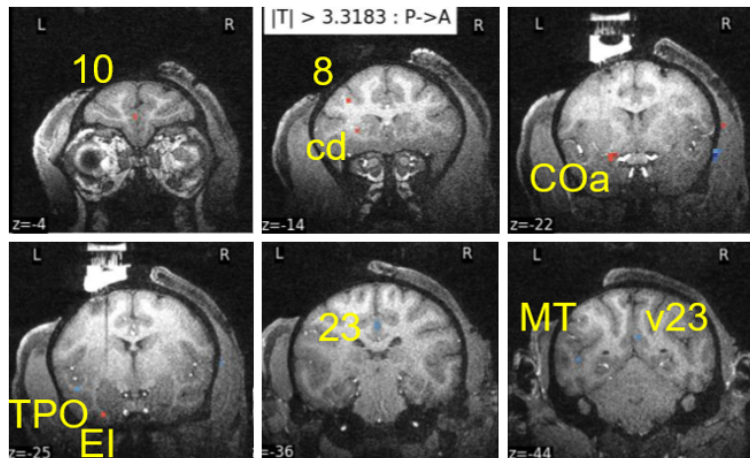

To support the specificity of the activation pattern following stimulation of basal nucleus of the amygdala, we present one example of a control stimulation outside the amygdala. In one of the penetrations, we stimulated putamen. Shown are all the slices containing activated voxels ( $P < 0.001$ ). Activated sites include: prefrontal 8, 10, possible COa (anterior cortical nucleus of amygdala or substantia innominata), caudate, temporal TPO, entorhinal EI, cingulate 23, and MT. No voxels were observed in the lateral sulcus and only one in the cingulate.

## Supplementary Analysis 1: Significance of activation in insula & lateral sulcus

It is known that insula and amygdala are functionally similar, both involved in social and emotional behaviors. Anatomical tracer studies also showed that there are widespread reciprocal connections between them. Consistent with the literatures, our stimulation in basal nucleus of amygdala also resulted in activation in insula and lateral sulcus. Here, we evaluate the probability to observe this connection by chance. We found that these connections are highly unlikely to be random.

In a single scan, there are 36,030 voxels in a single EPI image, and 222,912 voxels in the entire monkey brain. When stimulating site 30, we got 70 significant voxels ( $p$ -value 0.001) responding to INS, with a majority of these voxels (50 voxels) located in the lateral sulcus (See figure below). This suggests a striking enrichment of significant voxels solely in lateral sulcus. Therefore, we performed both Fisher's exact test and a simulation test to estimate the probability for a such enrichment.

In the Fisher's exact test, we found that voxel significance and location in the lateral sulcus are independent events ( $p$ -value  $< 2.2e-16$ , odds ratio 764). In other words, there is an enrichment of significant voxels in the lateral sulcus (defined here as a combination of brain regions CM, RM, R, SII, Ig, Id, Ri, 7op, A1, AL), resulting in 771 voxels within the lateral sulcus.

|                        | in lateral sulcus | not in lateral sulcus | total  |
|------------------------|-------------------|-----------------------|--------|
| significant voxels     | 50                | 20                    | 70     |
| non-significant voxels | 721               | 222121                | 222842 |
| total                  | 771               | 222141                | 222912 |

In the simulation test, we randomly sampled 70 significant voxels over the whole brain, and then counted the number of significant voxels located in lateral sulcus. We repeated this for 100,000 simulations (See figure below). We found that in most of the simulations (79%), there were no significant voxels located in the lateral sulcus. In some simulations (19%), we found only 1 significant voxel in the lateral sulcus. None of the random samplings resulted in 50 voxels in lateral sulcus. We therefore conclude that the probability for our enrichment of 71% (50 out of 70) significant voxels in lateral sulcus is virtually 0 by chance.

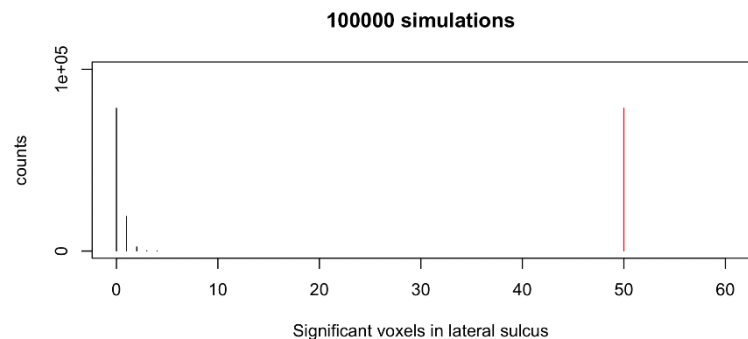

## **Appendix A: References for figure 1**

### **General Cortico-amygdala connections**

(D. G. Amaral & Price, 1984)

(Turner, Mishkin, & Knapp, 1980)

(Van Hoesen, 1981)

(Stefanacci & Amaral, 2002)

### **Striate visual cortex**

(D. G. Amaral, Behniea, & Kelly, 2003)

(Tigges et al., 1982)

(Mizuno et al., 1981)

(Iwai & Yukie, 1987)

### **Extrastriate visual cortex**

(Webster, Ungerleider, & Bachevalier, 1991)

(Grimaldi, Saleem, & Tsao, 2016)

(Saleem, Miller, & Price, 2014)

(Saleem, Kondo, & Price, 2008)

(D. G. Amaral et al., 2003)

### **Perirhinal, entorhinal, temporal pole**

(Insausti, Amaral, & Cowan, 1987)

(Morán, Mufson, & Mesulam, 1987)

(Stefanacci, Suzuki, & Amaral, 1996)

### **Insula**

(Mufson, Mesulam, & Pandya, 1981)

(Jezzini et al., 2015)

(Evrard, 2019)

### **Cingulate and prefrontal cortex**

(Vogt & Pandya, 1987)

(Morecraft et al., 2007)

(Morecraft & van Hoesen, 1992)  
(Sharma, Kelly, Pfeifer, & Fudge, 2020)  
(Porrino, Crane, & Goldman-Rakic, 1981)  
(Ghashghaei & Barbas, 2002)  
(D. Amaral, Price, Pitkanen, & Carmichael, 1992)  
(Barbas & De Olmos, 1990)  
(Carmichael & Price, 1995)

**Auditory Association cortex**

(Yukie, 2002)  
(Kosmal & Kowalska, 1997)

- Amaral, D., Price, J., Pitkanen, A., & Carmichael, S. T. (1992). Anatomical organization of the primate amygdaloid complex, in *The Amygdala: Neurobiological Aspects of Emotion, Memory, and Mental Dysfunction*, ed. J. Aggleton, 1--66.
- Amaral, D. G., Behniea, H., & Kelly, J. L. (2003). Topographic organization of projections from the amygdala to the visual cortex in the macaque monkey. *Neuroscience*, *118*(4), 1099-1120. doi:10.1016/s0306-4522(02)01001-1
- Amaral, D. G., & Price, J. L. (1984). Amygdalo-cortical projections in the monkey (*Macaca fascicularis*). *J Comp Neurol*, *230*(4), 465-496. doi:10.1002/cne.902300402
- Barbas, H., & De Olmos, J. (1990). Projections from the amygdala to basoventral and mediodorsal prefrontal regions in the rhesus monkey. *J Comp Neurol*, *300*(4), 549-571. doi:10.1002/cne.903000409
- Carmichael, S. T., & Price, J. L. (1995). Limbic connections of the orbital and medial prefrontal cortex in macaque monkeys. *J Comp Neurol*, *363*(4), 615-641. doi:10.1002/cne.903630408
- Evrard, H. C. (2019). The Organization of the Primate Insular Cortex. *Front Neuroanat*, *13*, 43. doi:10.3389/fnana.2019.00043
- Ghashghaei, H. T., & Barbas, H. (2002). Pathways for emotion: interactions of prefrontal and anterior temporal pathways in the amygdala of the rhesus monkey. *Neuroscience*, *115*(4), 1261-1279. doi:10.1016/s0306-4522(02)00446-3
- Grimaldi, P., Saleem, K. S., & Tsao, D. (2016). Anatomical Connections of the Functionally Defined "Face Patches" in the Macaque Monkey. *Neuron*, *90*(6), 1325-1342. doi:10.1016/j.neuron.2016.05.009
- Insausti, R., Amaral, D. G., & Cowan, W. M. (1987). The entorhinal cortex of the monkey: II. Cortical afferents. *Journal of Comparative Neurology*, *264*(3), 356-395.
- Iwai, E., & Yukie, M. (1987). Amygdalofugal and amygdalopetal connections with modality-specific visual cortical areas in macaques (*Macaca fuscata*, *M. mulatta*, and *M. fascicularis*). *Journal of Comparative Neurology*, *261*(3), 362-387.
- Jezzini, A., Rozzi, S., Borra, E., Gallese, V., Caruana, F., & Gerbella, M. (2015). A shared neural network for emotional expression and perception: An anatomical study in the macaque monkey. *Frontiers in Behavioral Neuroscience*, *9*(September). doi:10.3389/fnbeh.2015.00243
- Kosmal, A., & Kowalska, D. M. (1997). Thalamic and amygdaloid connections of the auditory association cortex of the superior temporal gyrus in rhesus monkey (*Macaca mulatta*). *Acta neurobiologiae experimentalis*, *3*(57), 165-188.
- Mizuno, N., Uchida, K., Nomura, S., Nakamura, Y., Sugimoto, T., & Uemura-Sumi, M. (1981). Extrageniculate projections to the visual cortex in the macaque monkey: an HRP study. *Brain research*, *212*(2), 454-459.
- Morán, M. A., Mufson, E. J., & Mesulam, M. M. (1987). Neural inputs into the temporopolar cortex of the rhesus monkey. *Journal of Comparative Neurology*, *256*(1), 88-103.
- Morecraft, R. J., McNeal, D. W., Stilwell-Morecraft, K. S., Gedney, M., Ge, J., & Schroeder, C. M. a. (2007). Amygdala interconnections with the cingulate motor cortex in the rhesus monkey. *Journal of Comparative Neurology*, *500*(1), 134--165. doi:10.1002/cne.21165
- Morecraft, R. J., & van Hoesen, G. W. (1992). Cingulate input to the primary and supplementary motor cortices in the rhesus monkey: Evidence for somatotopy in areas 24c and 23c. *Journal of Comparative Neurology*, *322*(4), 471--489. doi:10.1002/cne.903220403
- Mufson, E. J., Mesulam, M. M., & Pandya, D. N. (1981). Insular interconnections with the amygdala in the rhesus monkey. *Neuroscience*, *6*(7), 1231-1248.
- Porrino, L. J., Crane, A. M., & Goldman-Rakic, P. S. (1981). Direct and indirect pathways from the amygdala to the frontal lobe in rhesus monkeys. *Journal of Comparative Neurology*, *198*(1), 121-136.

- Saleem, K. S., Kondo, H., & Price, J. L. (2008). Complementary circuits connecting the orbital and medial prefrontal networks with the temporal, insular, and opercular cortex in the macaque monkey. *J Comp Neurol*, *506*(4), 659-693. doi:10.1002/cne.21577
- Saleem, K. S., Miller, B., & Price, J. L. (2014). Subdivisions and connectional networks of the lateral prefrontal cortex in the macaque monkey. *J Comp Neurol*, *522*(7), 1641-1690. doi:10.1002/cne.23498
- Sharma, K. K., Kelly, E. A., Pfeifer, C. W., & Fudge, J. L. (2020). Translating Fear Circuitry: Amygdala Projections to Subgenual and Perigenual Anterior Cingulate in the Macaque. *Cereb Cortex*, *30*(2), 550-562. doi:10.1093/cercor/bhz106
- Stefanacci, L., & Amaral, D. G. (2002). Some observations on cortical inputs to the macaque monkey amygdala: An anterograde tracing study. *Journal of Comparative Neurology*, *451*(4), 301--323. doi:10.1002/cne.10339
- Stefanacci, L., Suzuki, W. A., & Amaral, D. G. (1996). Organization of connections between the amygdaloid complex and the perirhinal and parahippocampal cortices in macaque monkeys. *Journal of Comparative Neurology*, *375*(4), 552-582.
- Tigges, J., Tigges, M., Cross, N. A., McBride, R. L., Letbetter, W. D., & Ansel, S. (1982). Subcortical structures projecting to visual cortical areas in squirrel monkey. *Journal of Comparative Neurology*, *209*(1), 29-40.
- Turner, B. H., Mishkin, M., & Knapp, M. (1980). Organization of the amygdalopetal projections from modality-specific cortical association areas in the monkey. *J Comp Neurol*, *191*(4), 515-543. doi:10.1002/cne.901910402
- Van Hoesen, G. (1981). The differential distribution, diversity and sprouting of cortical projections to the amygdala in the rhesus monkey. *The amygdaloid complex*, 77-89.
- Vogt, B. A., & Pandya, D. N. (1987). Cingulate cortex of the rhesus monkey: II. Cortical afferents. *Journal of Comparative Neurology*, *262*(2), 271-289.
- Webster, M. J., Ungerleider, L. G., & Bachevalier, J. (1991). Connections of inferior temporal areas TE and TEO with medial temporal-lobe structures in infant and adult monkeys. *Journal of Neuroscience*, *11*(4), 1095-1116.
- Yukie, M. (2002). Connections between the amygdala and auditory cortical areas in the macaque monkey. *Neuroscience Research*, *42*(3), 219-229. doi:10.1016/s0168-0102(01)00325-x
